# Supplementary material for: Transcriptional regulation of SARS-CoV-2 receptor ACE2 by SP1
Source: eLife journal article supplement (doi:10.7554/elife.85985), 2024-02-06
Supplement: fig1-data3 [file Figure 1B.xlsx]

## Sheet: Figure 1B
ACE2/Actin
Veh	SARS-CoV-2	Col	SARS-CoV-2+Col
1.00235	2.4493	0.670248	1.14948
1.00285	1.69883	0.516383	0.475479
0.999352	1.85399	0.877416	1.05055
