# Supplementary material for: Transcriptional regulation of SARS-CoV-2 receptor ACE2 by SP1
Source: eLife journal article supplement (doi:10.7554/elife.85985), 2024-02-06
Supplement: fig1-data4 [file Figure 1D.xlsx]

## Sheet: Figure 1D
Relative ACE2 fluorescence intensity
Veh	SARS-CoV-2	Col	SARS-CoV-2+Col
1.02729	2.42698	0.60418	0.530727
0.991241	1.79984	0.623453	0.601574
0.981468	2.23067	0.573073	0.52101
