# Supplementary material for: Transcriptional regulation of SARS-CoV-2 receptor ACE2 by SP1
Source: eLife journal article supplement (doi:10.7554/elife.85985), 2024-02-06
Supplement: fig2-data1 [file Figure 2D.xlsx]

## Sheet: Figure 2D
Relatuve p-Sp1 fluorescence intensity
Veh	SARS-CoV-2	Col	SARS-CoV-2+Col
1.02074	1.5621	0.300737	0.589908
0.957304	1.43569	0.398571	0.558249
1.02279	1.42415	0.380783	0.767005
