# Supplementary material for: Transcriptional regulation of SARS-CoV-2 receptor ACE2 by SP1
Source: eLife journal article supplement (doi:10.7554/elife.85985), 2024-02-06
Supplement: fig2-data2 [file Figure 2F.xlsx]

## Sheet: Figure 2F
Relative nuclear HNF4αfluorescence intensity
Veh	SARS-CoV-2	Col	SARS-CoV-2+Col
1.31045	0.218368	1.79645	1.7425
0.868263	0.256395	1.88018	1.79913
0.823184	0.268789	1.80505	1.77882
