# Supplementary material for: Transcriptional regulation of SARS-CoV-2 receptor ACE2 by SP1
Source: eLife journal article supplement (doi:10.7554/elife.85985), 2024-02-06
Supplement: fig3-data4 [file Figure 3B and 3D.xlsx]

## Sheet: Figure 3B
ACE2/Actin
Veh	Col	MithA	siSp1	Col+MithA	Col+siSp1
1.00825	0.727933	0.517463	0.712286	0.717888	0.508392
1.00003	0.588775	0.740281	0.717258	0.384963	0.319647
0.991715	0.782792	0.699495	0.771564	0.409474	0.309682

## Sheet: Figure 3D
ACE2/Actin
Veh	Col	BI6015	siHNF4α	Col+BI6015	Col+siHNF4α
0.997422	0.503467	1.51897	1.73801	1.3077	0.893544
1.00201	0.423794	1.50689	1.7283	1.68341	1.04793
1.00056	0.216652	1.77366	1.80515	0.889807	1.0016
