# Supplementary material for: Transcriptional regulation of SARS-CoV-2 receptor ACE2 by SP1
Source: eLife journal article supplement (doi:10.7554/elife.85985), 2024-02-06
Supplement: fig3-data5 [file Figure 3F.xlsx]

## Sheet: Sheet1
Relative ACE2 fluorescence intensity
Veh	MithA	BI6015	Col	Col+MithA	Col+BI6015
0.881667	0.434573	1.36009	0.490726	0.751239	1.1591
0.968932	0.566752	1.34902	0.601709	0.677436	0.931154
1.15154	0.744487	1.37295	0.546795	0.672436	1.18735
