# Supplementary material for: Transcriptional regulation of SARS-CoV-2 receptor ACE2 by SP1
Source: eLife journal article supplement (doi:10.7554/elife.85985), 2024-02-06
Supplement: fig3-data6 [file Figure 3G.xlsx]

## Sheet: Sheet1
Relative ACE2 luc activity
Veh	MithA	BI6015	Col	Col+MithA	Col+BI6015
0.97155	0.375622	1.48345	0.235699	0.478877	1.50276
1.08076	0.442182	1.69506	0.318676	0.391812	1.25731
0.945728	0.32579	1.68514	0.33478	0.350583	1.21402
