# Supplementary material for: Transcriptional regulation of SARS-CoV-2 receptor ACE2 by SP1
Source: eLife journal article supplement (doi:10.7554/elife.85985), 2024-02-06
Supplement: fig3-data7 [file Figure 3H.xlsx]

## Sheet: Sheet1
	Veh	Veh	Veh	Col	Col	Col
-776	1	1	1	0.25349	0.426317	0.63728
-136	1	1	1	2.05623	1.72907	1.54756
