# Supplementary material for: Transcriptional regulation of SARS-CoV-2 receptor ACE2 by SP1
Source: eLife journal article supplement (doi:10.7554/elife.85985), 2024-02-06
Supplement: fig4-data1 [file Figure 4B.xlsx]

## Sheet: Figure 4B
Relative p-Sp1 fluorescence intensity
Veh	Col	MithA	BI6015
1.03269	0.6092	0.713343	1.70197
0.952571	0.599657	0.703657	1.40223
1.02014	0.621743	0.681971	1.34486
