# Supplementary material for: Transcriptional regulation of SARS-CoV-2 receptor ACE2 by SP1
Source: eLife journal article supplement (doi:10.7554/elife.85985), 2024-02-06
Supplement: fig4-data2 [file Figure 4D.xlsx]

## Sheet: Figure 4D
Relative nuclear HNF4α fluorescence intensity
Veh	Col	MithA	BI6015
1.00972	1.31913	1.36907	0.811091
0.965995	1.39458	1.44797	0.806158
1.02425	1.41182	1.27269	0.747708
