# Supplementary material for: Transcriptional regulation of SARS-CoV-2 receptor ACE2 by SP1
Source: eLife journal article supplement (doi:10.7554/elife.85985), 2024-02-06
Supplement: fig4-data5 [file Figure 4F.xlsx]

## Sheet: Sheet1
p-SP1/Actin
NC	siSp1	siHNF4α
0.999549	0.61589	3.02461
1.08412	0.638742	2.85568
1.0055	0.253514	2.33192
HNF4α/Actin
NC	siSp1	siHNF4α
0.967239	0.904034	0.197271
1.00116	0.894756	0.158051
0.999871	1.03333	0.6285
