# Supplementary material for: Transcriptional regulation of SARS-CoV-2 receptor ACE2 by SP1
Source: eLife journal article supplement (doi:10.7554/elife.85985), 2024-02-06
Supplement: fig5-data3 [file Figure 5B and 5C.xlsx]

## Sheet: Figure 5B and 5C
The ratio of p-AKT(S473)/AKT
Veh	SARS-CoV-2	Col	SARS-CoV-2+Col
0.992582	2.64047	0.621947	0.529945
1.00044	2.07363	0.604497	0.54244
0.999281	2.55566	0.666727	0.574106
The ratio of p-AKT(T308)/AKT
Veh	SARS-CoV-2	Col	SARS-CoV-2+Col
1.00512	2.28416	0.338254	0.629018
1.00624	2.11806	0.355857	0.665395
1.00013	2.27233	0.377247	0.689685
