# Supplementary material for: Transcriptional regulation of SARS-CoV-2 receptor ACE2 by SP1
Source: eLife journal article supplement (doi:10.7554/elife.85985), 2024-02-06
Supplement: fig5-data5 [file Figure 5E.xlsx]

## Sheet: Sheet1
ACE2/Actin
Ctrl	siAKT	LY	Wort
1.0056	0.540706	0.411154	0.497128
1.06706	0.451292	0.495505	0.29281
0.99917	0.36911	0.381053	0.253829
