# Supplementary material for: Transcriptional regulation of SARS-CoV-2 receptor ACE2 by SP1
Source: eLife journal article supplement (doi:10.7554/elife.85985), 2024-02-06
Supplement: fig5-data6 [file Figure 5G.xlsx]

## Sheet: Sheet1
Relative ACE2 fluorescence intensity
Ctrl	siAKT	LY	Wort
0.951914	0.430876	0.329628	0.253697
0.787939	0.403608	0.343655	0.343419
1.26033	0.533456	0.348637	0.335396
