# Supplementary material for: Transcriptional regulation of SARS-CoV-2 receptor ACE2 by SP1
Source: eLife journal article supplement (doi:10.7554/elife.85985), 2024-02-06
Supplement: fig5-data6 [file Figure 5I.xlsx]

## Sheet: Sheet1
Ctrl	siAKT	LY	Wort
1.07588	0.579036	0.39651	0.421486
0.96377	0.587631	0.49416	0.48858
0.960114	0.69765	0.427683	0.362227
