# Supplementary material for: Transcriptional regulation of SARS-CoV-2 receptor ACE2 by SP1
Source: eLife journal article supplement (doi:10.7554/elife.85985), 2024-02-06
Supplement: fig5-data6 [file Figure 5K.xlsx]

## Sheet: Sheet1
	Relative nuclear HNF4α fluorescence intensity
Ctrl	siAKT	LY	Wort
0.967375	1.9957	1.77061	1.97828
1.01984	2.20179	2.04855	2.42915
1.01327	1.87611	2.00483	1.77312
