# Supplementary material for: Transcriptional regulation of SARS-CoV-2 receptor ACE2 by SP1
Source: eLife journal article supplement (doi:10.7554/elife.85985), 2024-02-06
Supplement: fig6-data1 [file Figure 6C.xlsx]

## Sheet: Sheet1
Lung	Copis (×10^5)/μg tatol RNA
	Ctrl	Veh	Col	MithA
	0	22.3897	1.70596	13.1494
	0	44.5027	5.21342	16.7835
	0	18.0432	1.74525	11.5652
	0	24.575	5.31997	5.35934
	0	43.5643	2.20033	8.30085
		Unpaired t test with Welch's correction			F test to compare variances
	Col	P value	0.0075		F, DFn, Dfd	44.84, 4, 4
	vs.	P value summary	**		P value	0.0028
	Veh	Significantly different (P < 0.05)?	Yes		P value summary	**
		One- or two-tailed P value?	Two-tailed		Significantly different (P < 0.05)?	Yes
		Welch-corrected t, df	t=4.853, df=4.178
		Unpaired t test			F test to compare variances
	MithA	P value	0.0107		F, DFn, Dfd	8.037, 4, 4
	vs.	P value summary	*		P value	0.0681
	Veh	Significantly different (P < 0.05)?	Yes		P value summary	ns
		One- or two-tailed P value?	Two-tailed		Significantly different (P < 0.05)?	No
		t, df	t=3.310, df=8
