# Supplementary material for: Transcriptional regulation of SARS-CoV-2 receptor ACE2 by SP1
Source: eLife journal article supplement (doi:10.7554/elife.85985), 2024-02-06
Supplement: fig6-data2 [file Figure 6D.xlsx]

## Sheet: Sheet1
Copis (×10^5)/μg tatol RNA
Ctrl	Veh	Col	MithA
0	26.95	1.8	10.93
0	12.42	3.8	4.12
0	10.09	1.9	8.72
0	11.7	2.05	3.64
0	12.97	1.92	2.95
Col	Mann Whitney test
vs.	P value	0.0079
Veh	Exact or approximate P value?	Exact
	P value summary	**
	Significantly different (P < 0.05)?	Yes
	One- or two-tailed P value?	Two-tailed
	Sum of ranks in column B,C	40 , 15
	Mann-Whitney U	0
MithA	Mann Whitney test
vs.	P value	0.0159
Veh	Exact or approximate P value?	Exact
	P value summary	*
	Significantly different (P < 0.05)?	Yes
	One- or two-tailed P value?	Two-tailed
	Sum of ranks in column B,C	39 , 16
	Mann-Whitney U	1
