# Supplementary material for: Transcriptional regulation of SARS-CoV-2 receptor ACE2 by SP1
Source: eLife journal article supplement (doi:10.7554/elife.85985), 2024-02-06
Supplement: fig6-data3 [file Figure 6G.xlsx]

## Sheet: Sheet1
	Histopathological scores
	Ctrl	Veh	Col	MithA
	0	6	4	4
	0	6	4	3
	0	9	4	4
	0	9	3	4
	0	5	3	3
Col	Mann Whitney test
vs.	P value	0.0079
Veh	Exact or approximate P value?	Exact
	P value summary	**
	Significantly different (P < 0.05)?	Yes
	One- or two-tailed P value?	Two-tailed
	Sum of ranks in column B,C	40 , 15
	Mann-Whitney U	0
MithA	Mann Whitney test
vs.	P value	0.0079
Veh	Exact or approximate P value?	Exact
	P value summary	**
	Significantly different (P < 0.05)?	Yes
	One- or two-tailed P value?	Two-tailed
	Sum of ranks in column B,C	40 , 15
	Mann-Whitney U	0
