# Supplementary material for: Transcriptional regulation of SARS-CoV-2 receptor ACE2 by SP1
Source: eLife journal article supplement (doi:10.7554/elife.85985), 2024-02-06
Supplement: fig6-data4 [file Figure 6H.xlsx]

## Sheet: Sheet1
Fibrotic area (%)
Ctrl	Veh	Col	MithA
6.72	22.69	2.9	4.91
5.64	26.18	2.31	4.79
4.6	30.69	8.4	3.19
4.23	13.4	2.43	6.74
4.58	21.02	3.63	2.31
Veh	Unpaired t test with Welch's correction			F test to compare variances
vs.	P value	0.0032		F, DFn, Dfd	39.54, 4, 4
Ctrl	P value summary	**		P value	0.0036
	Significantly different (P < 0.05)?	Yes		P value summary	**
	One- or two-tailed P value?	Two-tailed		Significantly different (P < 0.05)?	Yes
	Welch-corrected t, df	t=6.062, df=4.202
Col	Mann Whitney test
vs.	P value	0.0079
Veh	Exact or approximate P value?	Exact
	P value summary	**
	Significantly different (P < 0.05)?	Yes
	One- or two-tailed P value?	Two-tailed
	Sum of ranks in column B,C	40 , 15
	Mann-Whitney U	0
MithA	Unpaired t test with Welch's correction			F test to compare variances
vs.	P value	0.0022		F, DFn, Dfd	14.10, 4, 4
Veh	P value summary	**		P value	0.0252
	Significantly different (P < 0.05)?	Yes		P value summary	*
	One- or two-tailed P value?	Two-tailed		Significantly different (P < 0.05)?	Yes
	Welch-corrected t, df	t=6.189, df=4.565
