# Supplementary material for: Transcriptional regulation of SARS-CoV-2 receptor ACE2 by SP1
Source: eLife journal article supplement (doi:10.7554/elife.85985), 2024-02-06
Supplement: fig7-data1 [file Figure 7B.xlsx]

## Sheet: Sheet1
Relative nCoV-2-N fluorescence intensity
Ctrl	Veh	Col	MithA
0	0.755292	0.267207	0.240823
0	0.75581	0.157305	0.275903
0	1.14735	0.354241	0.281306
0	1.28726	0.338662	0.276717
0	1.05429	0.2705	0.604574
Col	Unpaired t test			F test to compare variances
vs.	P value	0.0002		F, DFn, Dfd	9.355, 4, 4
Veh	P value summary	***		P value	0.0524
	Significantly different (P < 0.05)?	Yes		P value summary	ns
	One- or two-tailed P value?	Two-tailed		Significantly different (P < 0.05)?	否
	t, df	t=6.450, df=8
MithA	Mann Whitney test
vs.	P value	0.0079
Veh	Exact or approximate P value?	Exact
	P value summary	**
	Significantly different (P < 0.05)?	Yes
	One- or two-tailed P value?	Two-tailed
	Sum of ranks in column B,C	40 , 15
	Mann-Whitney U	0
