# Supplementary material for: Transcriptional regulation of SARS-CoV-2 receptor ACE2 by SP1
Source: eLife journal article supplement (doi:10.7554/elife.85985), 2024-02-06
Supplement: fig7-data2 [file Figure 7D.xlsx]

## Sheet: Sheet1
Relative ACE2 fluorescence intensity
	Ctrl	Veh	Col	MithA
	1.0395	3.40431	1.28967	1.30892
	0.945924	2.70394	1.28155	1.6455
	0.989051	2.76489	0.931443	1.14803
	1.0239	4.54247	1.03775	0.939718
	1.00162	1.93832	1.06862	1.6307
Veh	Unpaired t test with Welch's correction			F test to compare variances
vs.	P value	0.0089		F, DFn, Dfd	731.5, 4, 4
Ctrl	P value summary	**		P value	<0.0001
	Significantly different (P < 0.05)?	Yes		P value summary	****
	One- or two-tailed P value?	Two-tailed		Significantly different (P < 0.05)?	Yes
	Welch-corrected t, df	t=4.755, df=4.011
Col	Unpaired t test with Welch's correction			F test to compare variances
vs.	P value	0.0102		F, DFn, Dfd	37.94, 4, 4
Veh	P value summary	*		P value	0.0039
	Significantly different (P < 0.05)?	Yes		P value summary	**
	One- or two-tailed P value?	Two-tailed		Significantly different (P < 0.05)?	Yes
	Welch-corrected t, df	t=4.421, df=4.211
MithA	Unpaired t test with Welch's correction			F test to compare variances
vs.	P value	0.0136		F, DFn, Dfd	10.08, 4, 4
Veh	P value summary	*		P value	0.0459
	Significantly different (P < 0.05)?	Yes		P value summary	*
	One- or two-tailed P value?	Two-tailed		Significantly different (P < 0.05)?	Yes
	Welch-corrected t, df	t=3.805, df=4.786
