# Supplementary material for: Transcriptional regulation of SARS-CoV-2 receptor ACE2 by SP1
Source: eLife journal article supplement (doi:10.7554/elife.85985), 2024-02-06
Supplement: fig7-data3 [file Figure7F.xlsx]

## Sheet: Sheet1
	Histopathological scores
	Ctrl	Veh	Col	MithA
	0	10	6	11
	0	10	7	7
	0	10	8	8
	0	12	8	9
	0	12	9	9
	Col	Mann Whitney test
	vs.	P value	0.0079
	Veh	Exact or approximate P value?	Exact
		P value summary	**
		Significantly different (P < 0.05)?	Yes
		One- or two-tailed P value?	Two-tailed
		Sum of ranks in column B,C	40 , 15
		Mann-Whitney U	0
	MithA	Mann Whitney test
	vs.	P value	0.0317
	Veh	Exact or approximate P value?	Exact
		P value summary	*
		Significantly different (P < 0.05)?	Yes
		One- or two-tailed P value?	Two-tailed
		Sum of ranks in column B,C	37 , 18
		Mann-Whitney U	3
