# Supplementary figures and images for: Transcriptional regulation of SARS-CoV-2 receptor ACE2 by SP1
Source: eLife journal article supplement (doi:10.7554/elife.85985), 2024-02-06

**Fig. 1A**

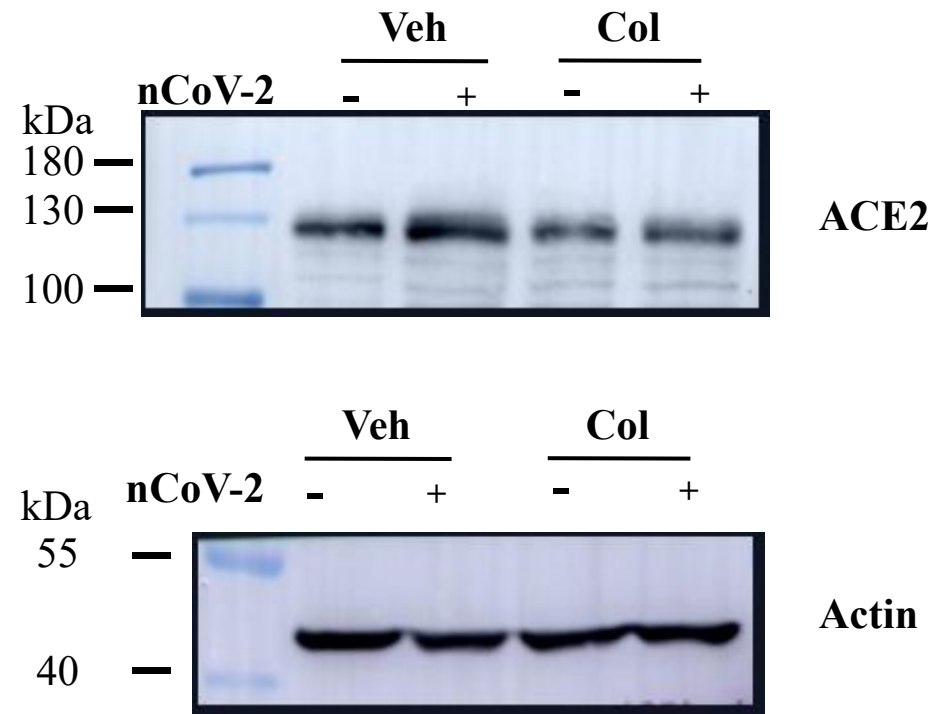

**Full scans for Figure 1A.**

Supplement: fig1-data2 [file elife-85985-fig1-data2-v1.zip]

Fig. 3A

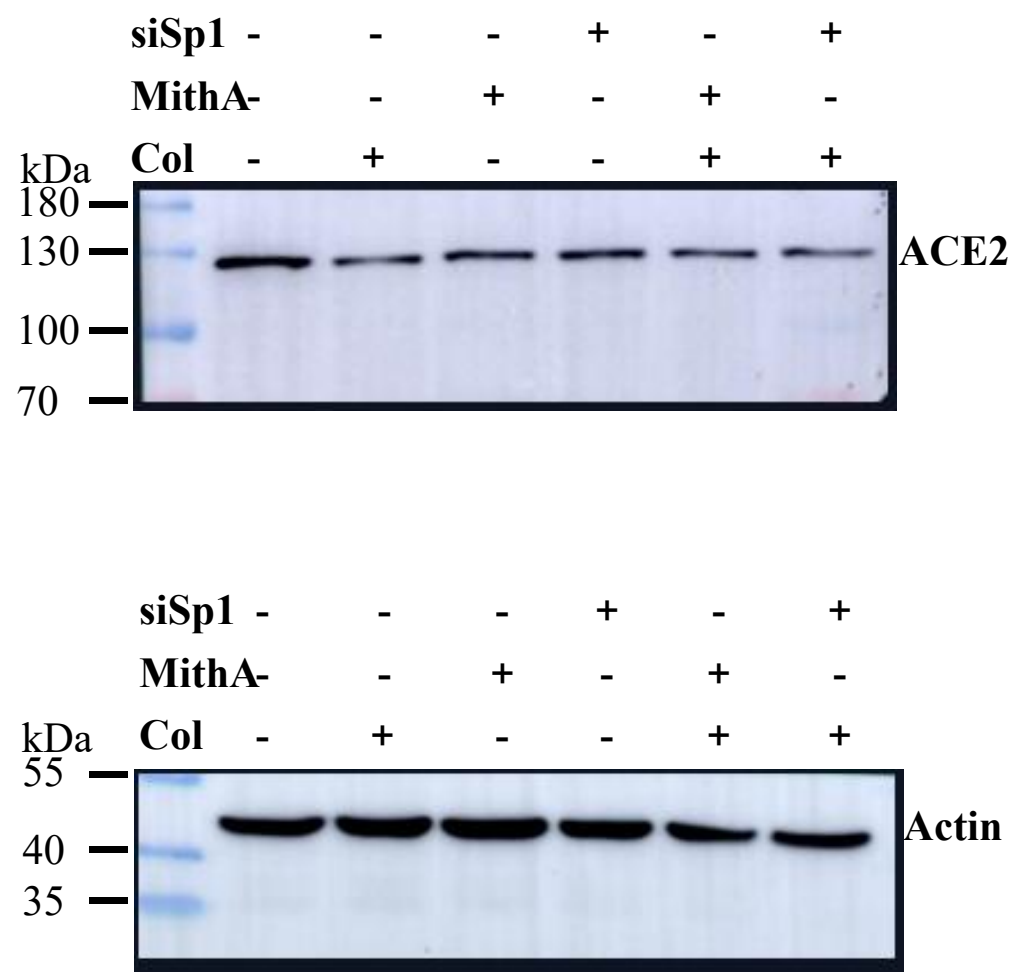

Fig. 3C

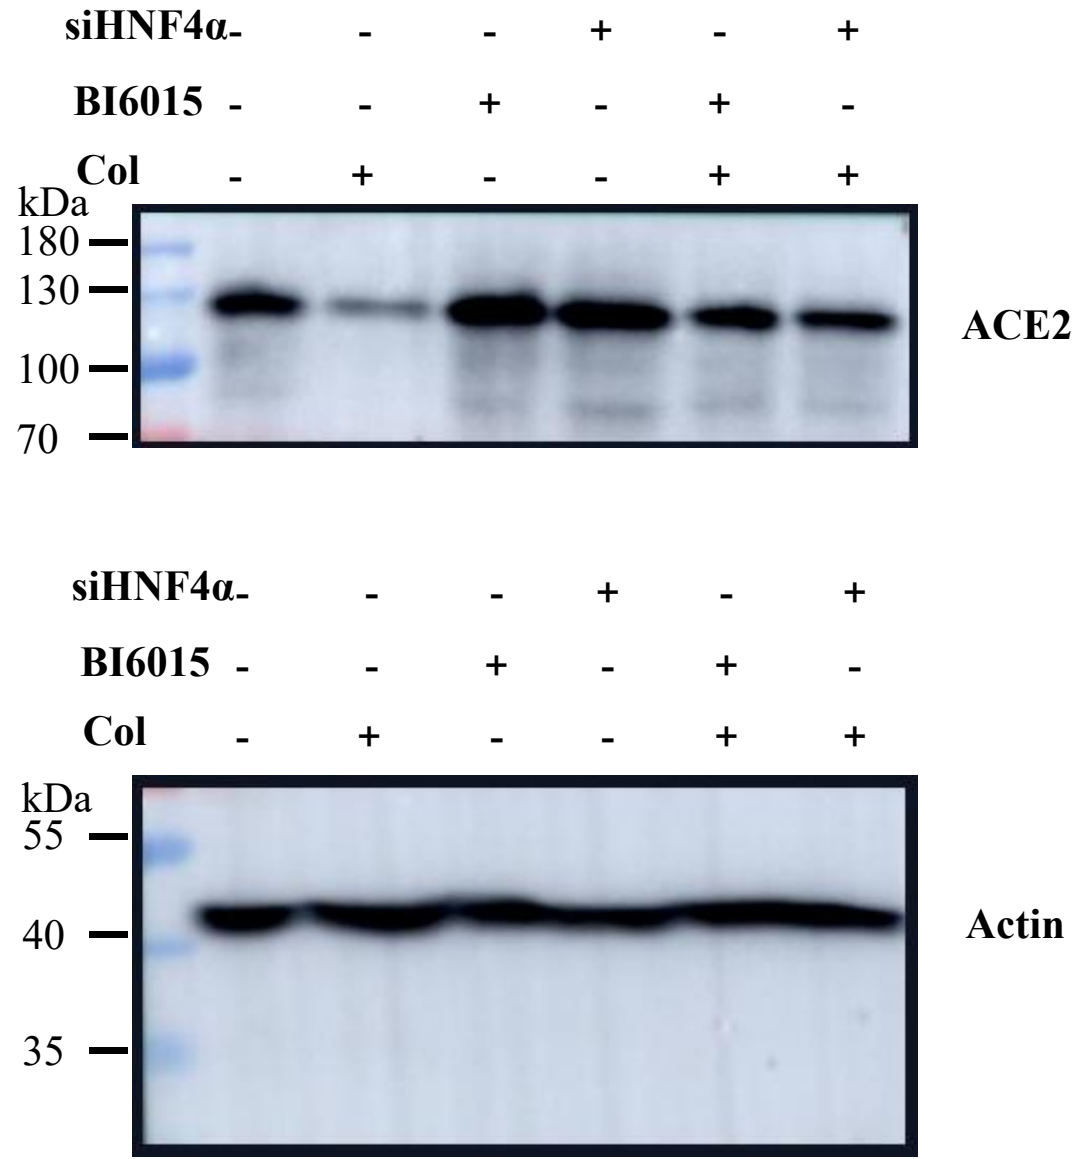

Full scans for Figure 3A and C.

Supplement: fig3-data3 [file elife-85985-fig3-data3-v1.zip]

**Fig. 4E**

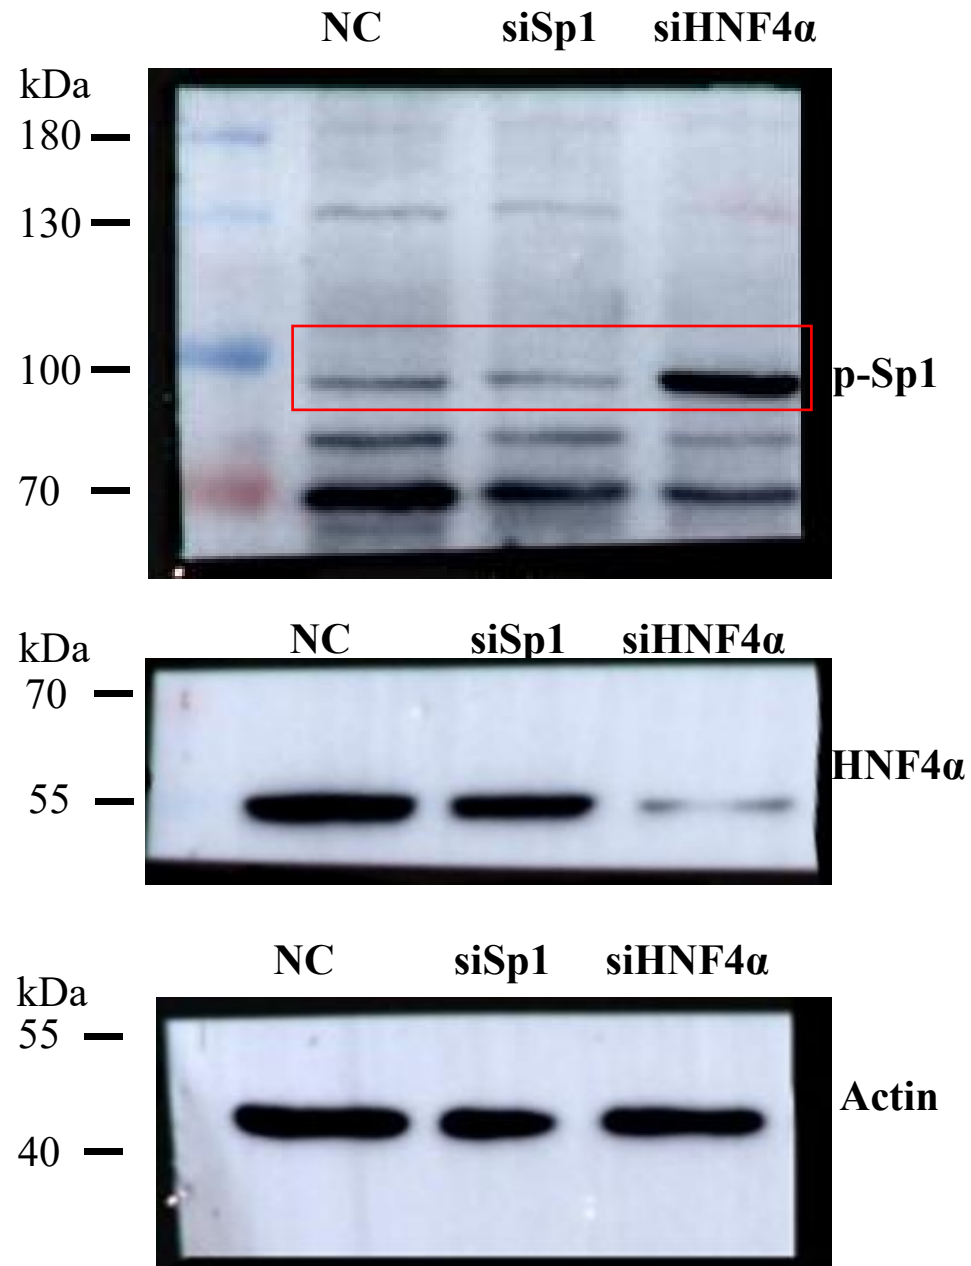

**Fig. 4G**

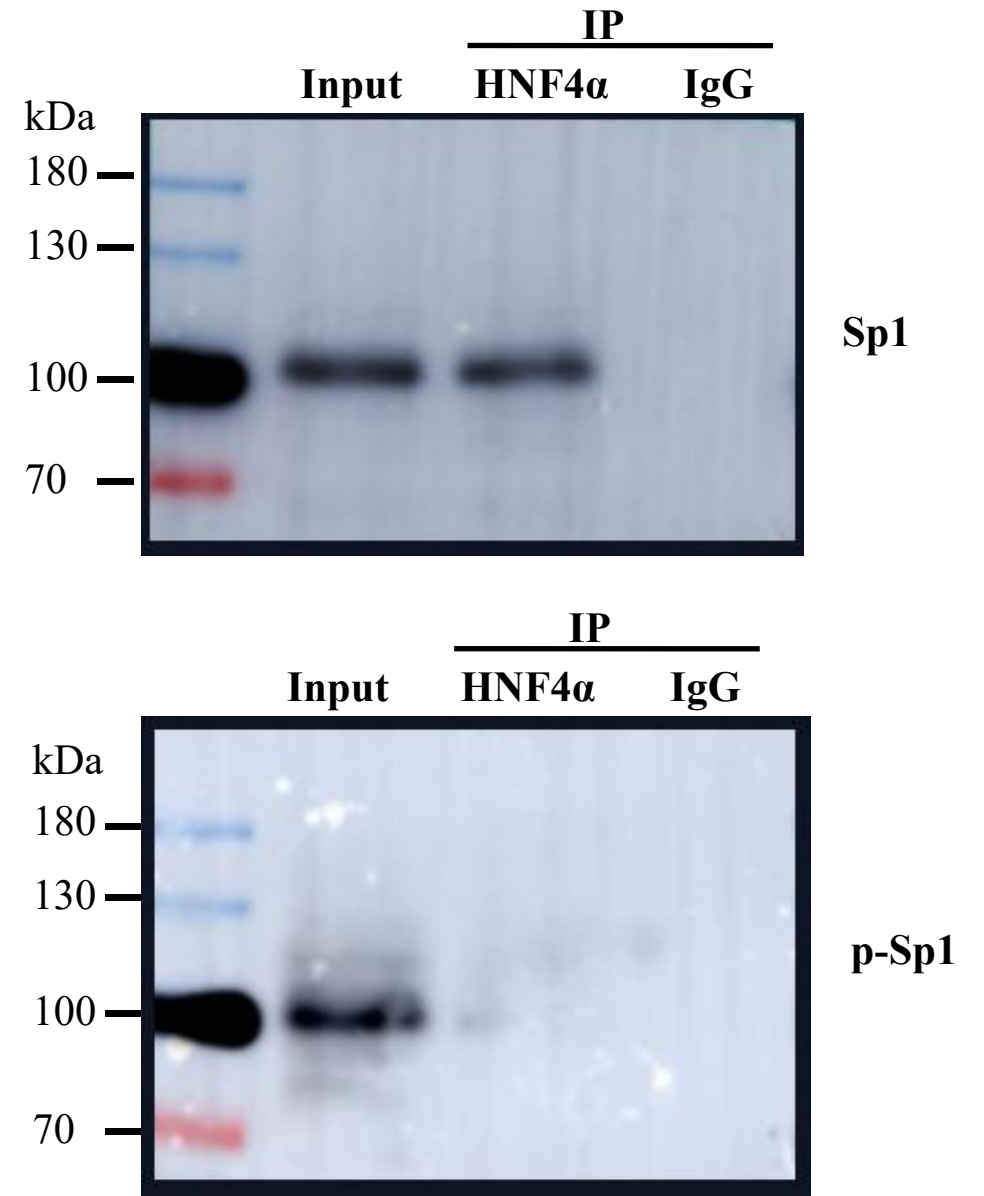

**Full scans for Figure 4E and G.**

Supplement: fig4-data4 [file elife-85985-fig4-data4-v1.zip]

**Fig. 5A**

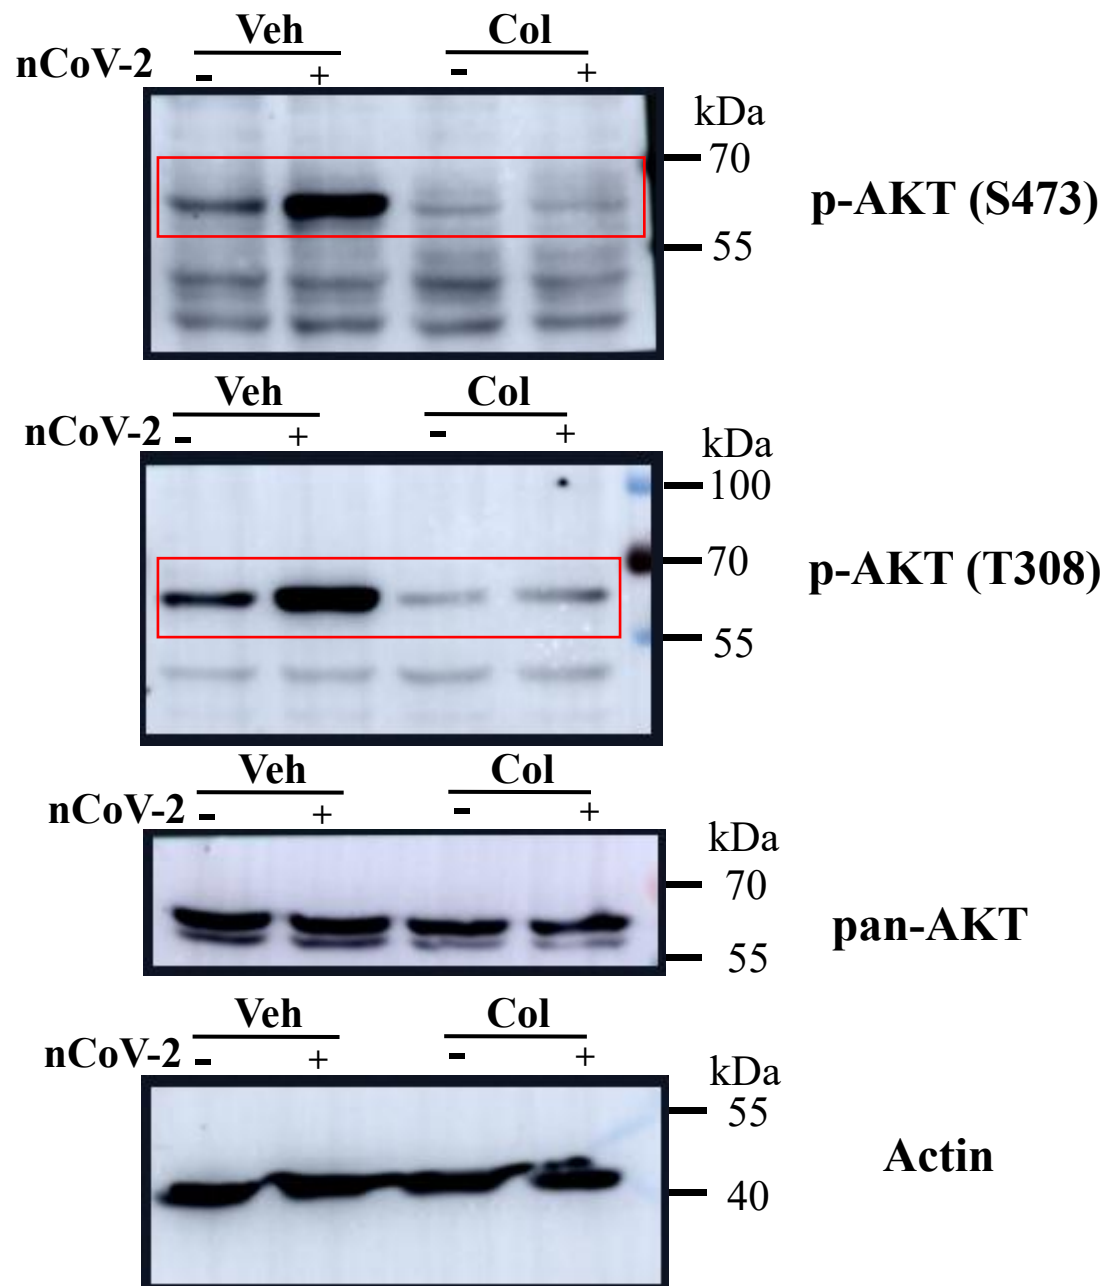

Full scans for Figure 5A and D.

**Fig. 5D**

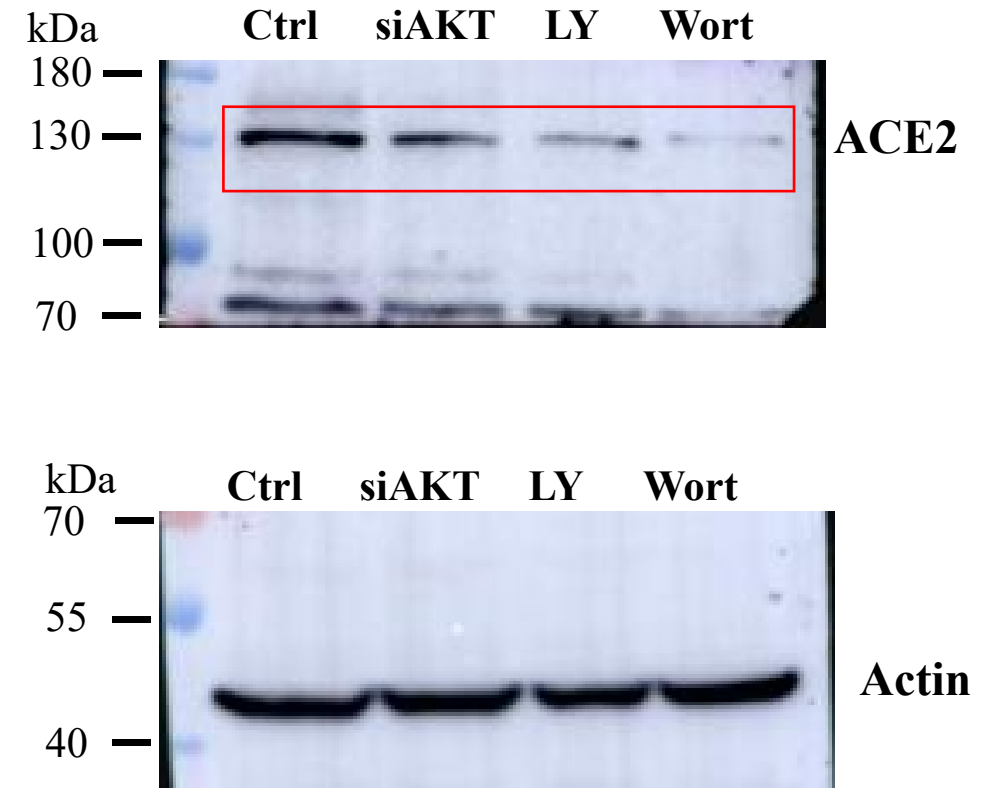

Supplement: fig5-data2 [file elife-85985-fig5-data2-v1.zip]
